# Supplementary material
Source: publisher figshare collection journal article supplement (https://sage.figshare.com/ndownloader/files/21802890)
Supplement: Supplementary file 1 [file 21802890]

a)

b)

c)


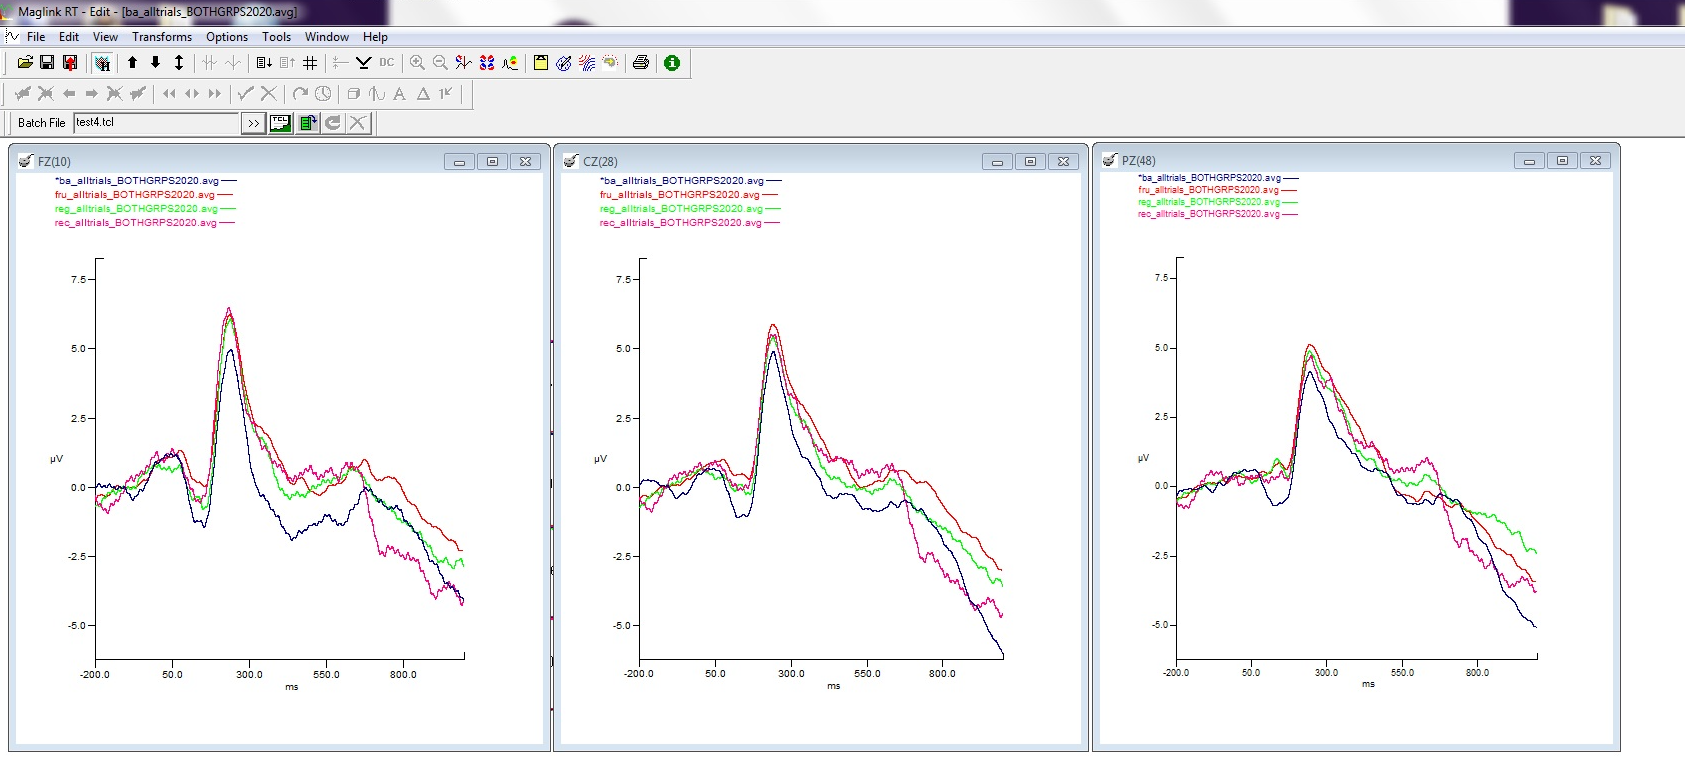

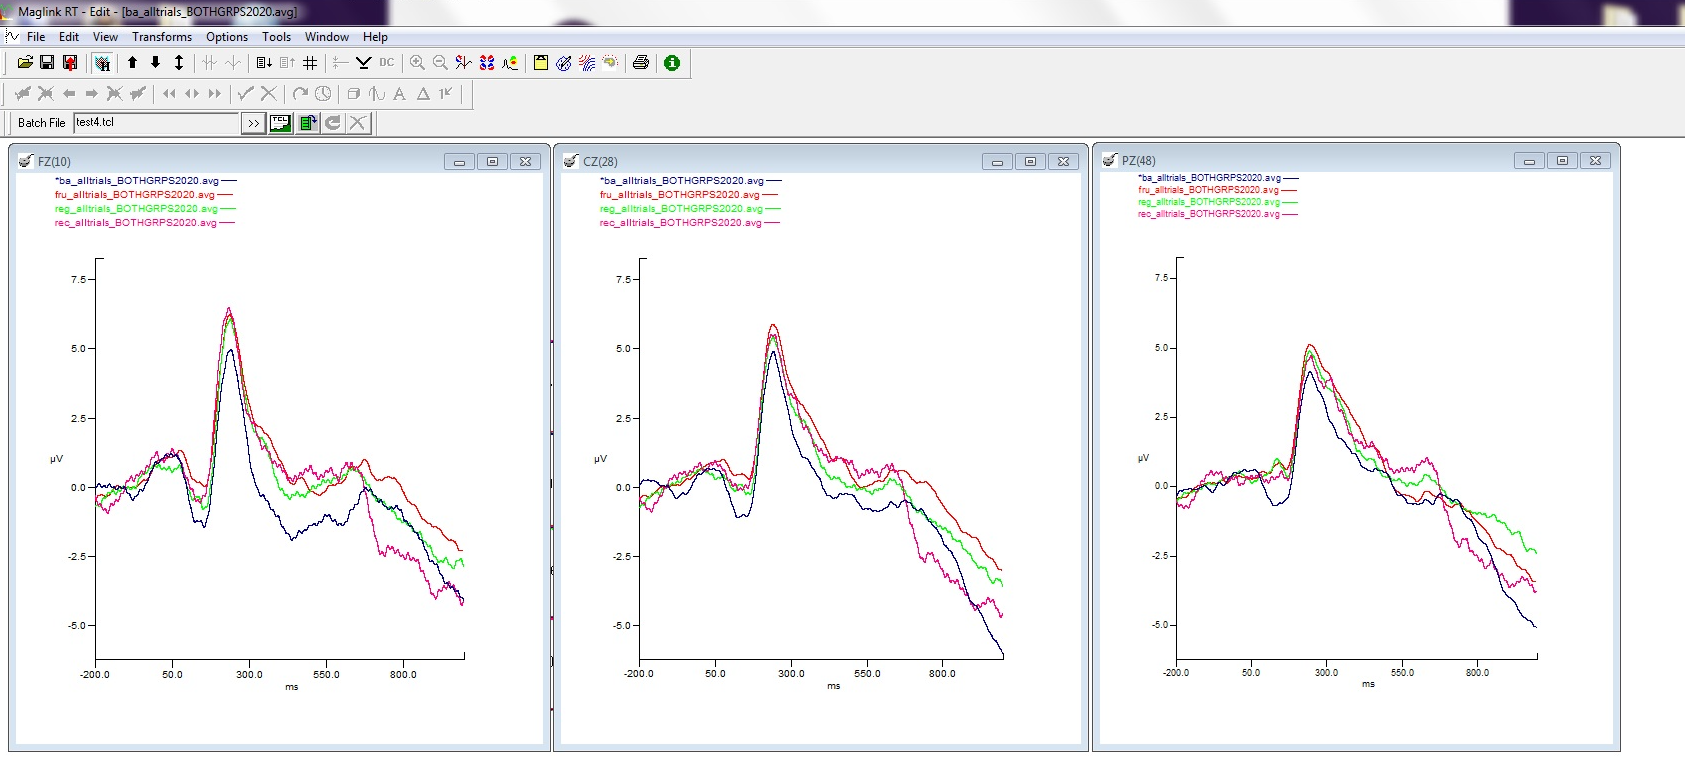

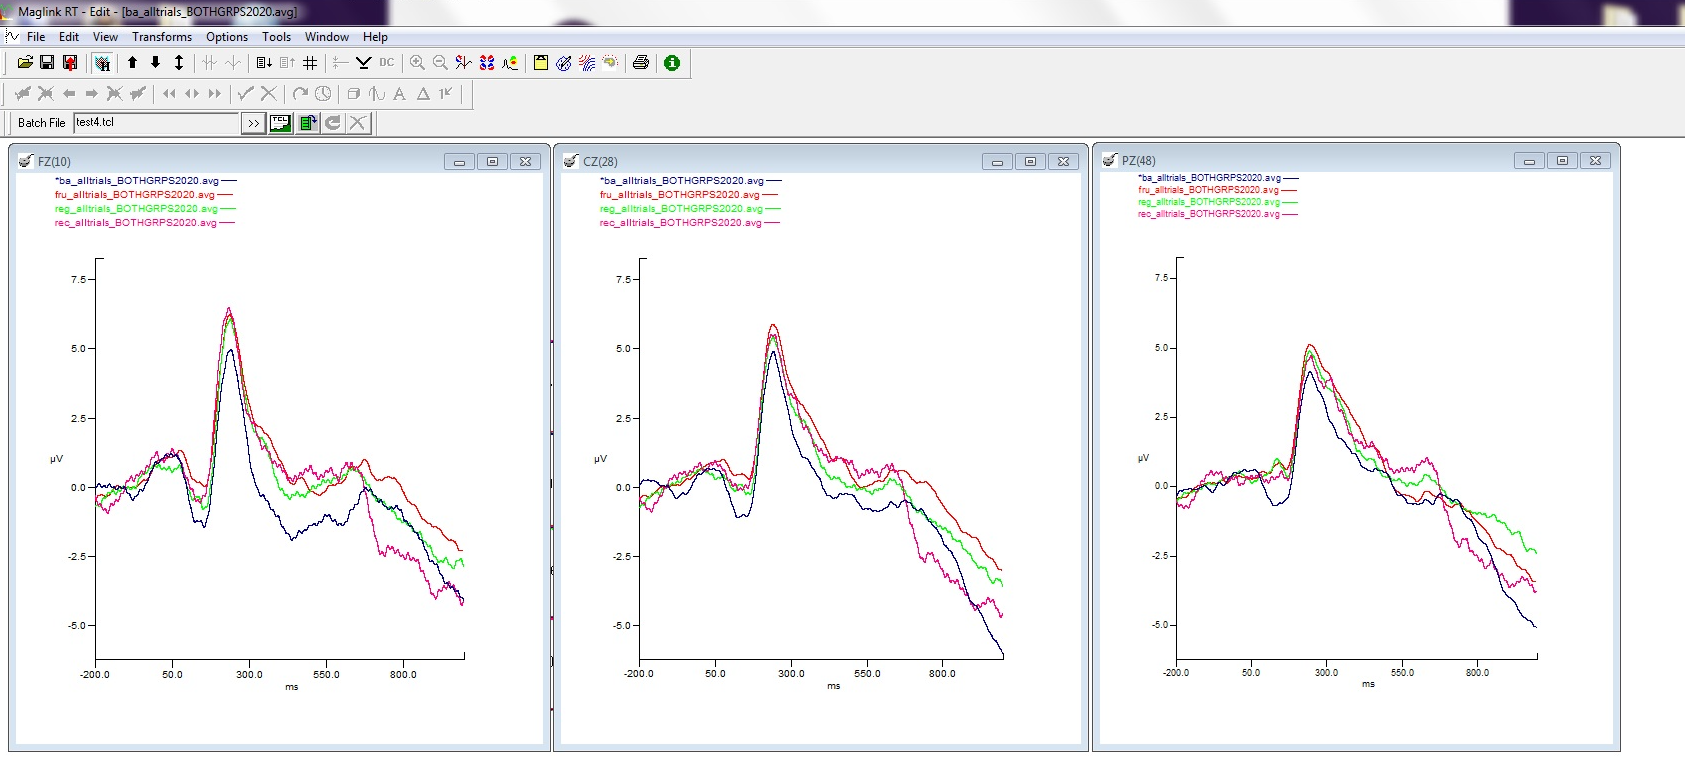


*Supplemental Figure 1:* Grand mean waveforms for each of the task conditions (baseline =blue, frustration =red, regulation = green, and recovery =pink) at frontal (a), central (b), and parietal (c) sites.


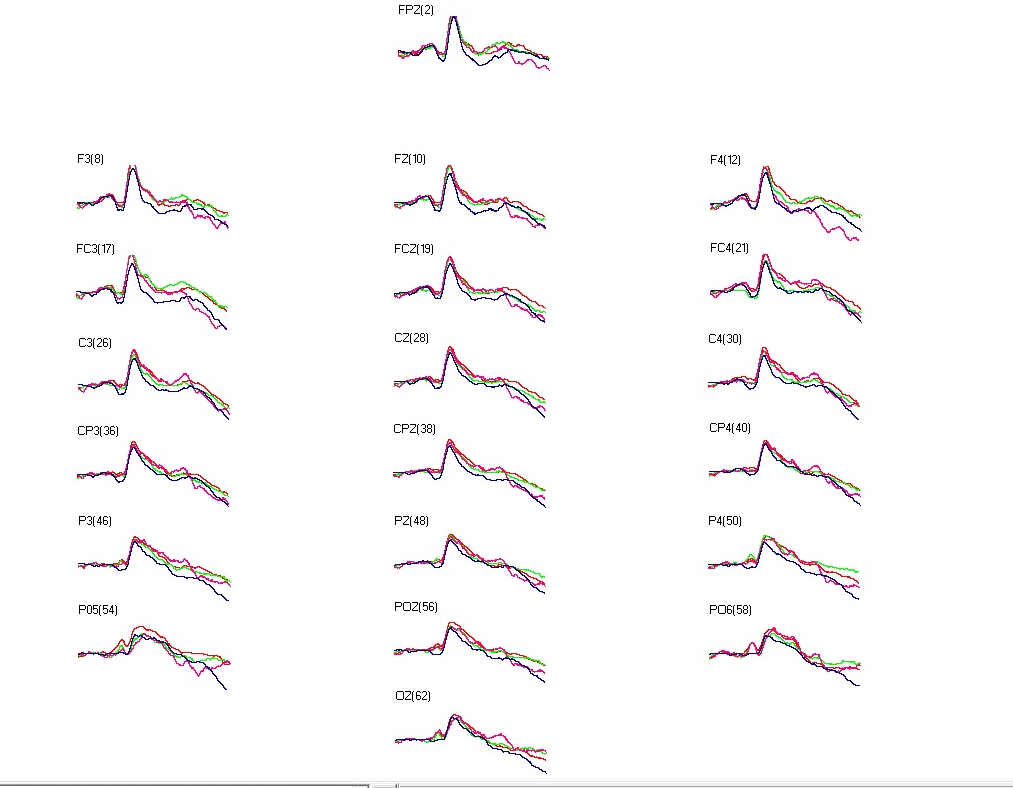


*Supplemental Figure 2.* Grand mean waveforms for each of the task conditions (baseline =blue, frustration =red, regulation = green, and recovery =pink) from anterior to poster sites across the midline region
